# Supplementary material
Source: publisher site journal article supplement (https://www.dovepress.com/article/383738)
Supplement: Supplementary file 1 [file get_supplementary_file.php]

## Supplementary

Supplement, Table 1 Biological drugs approved for the treatment of IBDs in Italy

| Biological drugs approved for IBDs in Italy | Therapeutic class    | Indications for use approved for IBDs                                                                                                                                                                                                                                                                                                                                                                                                                                                                                                                                                                                                                                                                                                                                                                                                                                                                                                                                                                                                                                                                                                                                | Other indications for use approved in Italy |
|---------------------------------------------|----------------------|----------------------------------------------------------------------------------------------------------------------------------------------------------------------------------------------------------------------------------------------------------------------------------------------------------------------------------------------------------------------------------------------------------------------------------------------------------------------------------------------------------------------------------------------------------------------------------------------------------------------------------------------------------------------------------------------------------------------------------------------------------------------------------------------------------------------------------------------------------------------------------------------------------------------------------------------------------------------------------------------------------------------------------------------------------------------------------------------------------------------------------------------------------------------|---------------------------------------------|
| Infliximab                                  | TNF-alpha inhibitors | <p><u>Adult Crohn's disease:</u></p> <ul style="list-style-type: none"> <li>• treatment of moderately to severely active Crohn's disease, in adult patients who have not responded despite a full and adequate course of therapy with a corticosteroid and/or an immunosuppressant; or who are intolerant to or have medical contraindications for such therapies;</li> <li>• treatment of fistulising, active Crohn's disease, in adult patients who have not responded despite a full and adequate course of therapy with conventional treatment (including antibiotics, drainage and immunosuppressive therapy).</li> </ul> <p><u>Paediatric Crohn's disease:</u> treatment of severe, active Crohn's disease, in children and adolescents aged 6 to 17 years, who have not responded to conventional therapy including a corticosteroid, an immunomodulator and primary nutrition therapy; or who are intolerant to or have contraindications for such therapies. Infliximab has been studied only in combination with conventional immunosuppressive therapy.</p> <p><u>Adult ulcerative colitis:</u> treatment of moderately to severely active ulcerative</p> | RA, PsA, AS, PsO                            |

|            |                      |                                                                                                                                                                                                                                                                                                                                                                                                                                                                                                                                                                                                                                                                                                    |                               |
|------------|----------------------|----------------------------------------------------------------------------------------------------------------------------------------------------------------------------------------------------------------------------------------------------------------------------------------------------------------------------------------------------------------------------------------------------------------------------------------------------------------------------------------------------------------------------------------------------------------------------------------------------------------------------------------------------------------------------------------------------|-------------------------------|
|            |                      | <p>colitis in adult patients who have had an inadequate response to conventional therapy including corticosteroids and 6-mercaptopurine (6-MP) or azathioprine (AZA), or who are intolerant to or have medical contraindications for such therapies.</p> <p><u>Paediatric ulcerative colitis:</u> treatment of severely active ulcerative colitis, in children and adolescents aged 6 to 17 years, who have had an inadequate response to conventional therapy including corticosteroids and 6-MP or AZA, or who are intolerant to or have medical contraindications for such therapies.</p>                                                                                                       |                               |
| Adalimumab | TNF-alpha inhibitors | <p><u>Adult Crohn's disease:</u> treatment of moderately to severely active Crohn's disease, in adult patients who have not responded despite a full and adequate course of therapy with a corticosteroid and/or an immunosuppressant; or who are intolerant to or have medical contraindications for such therapies;</p> <p><u>Paediatric Crohn's disease:</u> treatment of moderately to severely active Crohn's disease in paediatric patients (from 6 years of age) who have had an inadequate response to conventional therapy including primary nutrition therapy and a corticosteroid and/or an immunomodulator, or who are intolerant to or have contraindications for such therapies.</p> | RA, PsA, AS, JIA, PsO, Uv, HS |

|             |                      |                                                                                                                                                                                                                                                                                                                                                                                                                                                                                                                                                                                                                                                                                                                                    |                  |
|-------------|----------------------|------------------------------------------------------------------------------------------------------------------------------------------------------------------------------------------------------------------------------------------------------------------------------------------------------------------------------------------------------------------------------------------------------------------------------------------------------------------------------------------------------------------------------------------------------------------------------------------------------------------------------------------------------------------------------------------------------------------------------------|------------------|
|             |                      | <p><u>Adult ulcerative colitis:</u> treatment of moderately to severely active ulcerative colitis in adult patients who have had an inadequate response to conventional therapy including corticosteroids and 6-mercaptopurine (6-MP) or azathioprine (AZA), or who are intolerant to or have medical contraindications for such therapies;</p> <p><u>Paediatric ulcerative colitis:</u> treatment of moderately to severely active ulcerative colitis in paediatric patients (from 6 years of age) who have had an inadequate response to conventional therapy including corticosteroids and/or 6-mercaptopurine (6-MP) or azathioprine (AZA), or who are intolerant to or have medical contraindications for such therapies.</p> |                  |
| Golimumab   | TNF-alpha inhibitors | <p><u>Adult ulcerative colitis:</u> treatment of moderately to severely active ulcerative colitis in adult patients who have had an inadequate response to conventional therapy including corticosteroids and 6-mercaptopurine (6-MP) or azathioprine (AZA), or who are intolerant to or have medical contraindications for such therapies.</p>                                                                                                                                                                                                                                                                                                                                                                                    | RA, PsA, AS, JIA |
| Vedolizumab | Anti-integrins       | <p><u>Adult Crohn's disease:</u> treatment of adult patients with moderately to severely active Crohn's disease who have had an inadequate response with, lost response to, or were intolerant to either conventional therapy or a tumour necrosis factor-alpha (TNF<math>\alpha</math>) antagonist.</p>                                                                                                                                                                                                                                                                                                                                                                                                                           | -                |

|             |                        |                                                                                                                                                                                                                                                                                                                                                                                                                                                                                                                                                                                                                                          |          |
|-------------|------------------------|------------------------------------------------------------------------------------------------------------------------------------------------------------------------------------------------------------------------------------------------------------------------------------------------------------------------------------------------------------------------------------------------------------------------------------------------------------------------------------------------------------------------------------------------------------------------------------------------------------------------------------------|----------|
|             |                        | <p><u>Adult ulcerative colitis</u>: treatment of adult patients with moderately to severely active ulcerative colitis who have had an inadequate response with, lost response to, or were intolerant to either conventional therapy or a tumour necrosis factor-alpha (TNF<math>\alpha</math>) antagonist.</p>                                                                                                                                                                                                                                                                                                                           |          |
| Ustekinumab | Interleukin inhibitors | <p><u>Adult Crohn's disease</u>: treatment of adult patients with moderately to severely active Crohn's disease who have had an inadequate response with, lost response to, or were intolerant to either conventional therapy or a TNF<math>\alpha</math> antagonist or have medical contraindications to such therapies.</p> <p><u>Adult ulcerative colitis</u>: treatment of adult patients with moderately to severely active ulcerative colitis who have had an inadequate response with, lost response to, or were intolerant to either conventional therapy or a biologic or have medical contraindications to such therapies.</p> | PsO, PsA |

**Abbreviations:** IBDs= inflammatory bowel diseases; TNF= tumor necrosis factor; RA= Rheumatoid arthritis; PsA= Psoriatic arthritis; AS= Ankylosing spondylitis; PsO= Psoriasis; JIA= Juvenile idiopathic arthritis; Uv=Uveitis; HS= Hidradenitis suppurativa.

**Supplement, Table 2** NDC of mesalazine with specific indication for use for UC, according to Italian SmPCs

| <b>Formulations</b> | <b>NDC</b>                                                                                           |
|---------------------|------------------------------------------------------------------------------------------------------|
| TABLETS 1200 MG     | 037734023<br>037734011                                                                               |
| ENEMAS 2G           | 027357108<br>035358035<br>035356031<br>033081023<br>026416216                                        |
| ENEMAS 2G/30ML      | 027308042                                                                                            |
| ENEMAS 2G/50ML      | 034462034<br>026416141<br>035386046<br>034295030                                                     |
| ENEMAS 4G           | 034836039<br>035358047<br>035356043<br>033081035<br>026416230                                        |
| ENEMAS 4G/50ML      | 026416166<br>029050034                                                                               |
| ENEMAS 4G/100ML     | 033529037<br>033760344<br>033256037<br>035386034<br>029480047<br>033292018<br>026416154<br>029050046 |
| ENEMAS 4G/60ML      | 027308055<br>027357110                                                                               |

|                                        |                                                                                         |
|----------------------------------------|-----------------------------------------------------------------------------------------|
| VIALS 2G/50ML                          | 034218091                                                                               |
| VIALS 4G/100ML                         | 034218103<br>034295042                                                                  |
| RECTAL GEL 10%                         | 035356056<br>035358050                                                                  |
| RECTAL GEL 2G                          | 029480023<br>034556023                                                                  |
| RECTAL GEL 4G                          | 034556035<br>029480035                                                                  |
| RECTAL GEL 500MG                       | 033081050<br>035592017<br>034757043<br>026925180<br>027122151<br>034390029<br>034218040 |
| GRANULES FOR RECTAL SUSPENSION<br>2G   | 026416091                                                                               |
| GRANULES FOR RECTAL SUSPENSION<br>1,5G | 026925038<br>027122112                                                                  |
| RECTAL 100ML                           | 034462046                                                                               |
| RECTAL 2G/50ML                         | 034254033                                                                               |
| RECTAL 4G/60ML                         | 035075035                                                                               |
| RECTAL 4G/100ML                        | 034254045                                                                               |
| RECTAL 500ML                           | 032890028                                                                               |
| RECTAL FOAM 14G                        | 026925127                                                                               |
| RECTAL FOAM 28G                        | 026925115                                                                               |
| RECTAL FOAM 2G                         | 026925089<br>032890030<br>027122136<br>034218065                                        |

|                            |                                                                            |
|----------------------------|----------------------------------------------------------------------------|
| RECTAL FOAM 4G             | 026925077<br>027122148<br>034218053                                        |
| RECTAL FOAM 1G             | 026416267<br>026416279                                                     |
| RECTAL SUSPENSION 1,5G     | 034218038                                                                  |
| RECTAL SUSPENSION 1G/100ML | 027130020                                                                  |
| RECTAL SUSPENSION 2G       | 027122062<br>034836027<br>034757029                                        |
| RECTAL SUSPENSION 2G/100ML | 027130032                                                                  |
| RECTAL SUSPENSION 2G/50ML  | 034556062<br>034298036<br>034336038                                        |
| RECTAL SUSPENSION 4G       | 027122098<br>034757031<br>026925141                                        |
| RECTAL SUSPENSION 4G/100ML | 027130044<br>034556074<br>034336040<br>034298048                           |
| RECTAL SUPPOSITORY 1G      | 026416305<br>027130069                                                     |
| RECTAL SUPPOSITORY 400MG   | 027122011<br>027122023<br>027122035                                        |
| RECTAL SUPPOSITORY 500MG   | 034254058<br>026416127<br>026416139<br>034298051<br>033292044<br>027308067 |

|  |           |
|--|-----------|
|  | 029480074 |
|  | 034295055 |
|  | 034336053 |
|  | 029050010 |
|  | 033256049 |
|  | 035386059 |
|  | 034218115 |
|  | 034462059 |
|  | 033529049 |
|  | 035075047 |
|  | 026925154 |
|  | 034556086 |
|  | 027357096 |
|  | 033763032 |
|  | 035650011 |
|  | 035650062 |
|  | 035650023 |
|  | 035650035 |
|  | 035650047 |
|  | 035650050 |

**Abbreviations:** NDC = National drug code; SmPC= summary of product characteristics.



**Supplement, Table 3** Number of true positive, false positive, true negative and false negative cases for each algorithm developed for identification of the 83 CD patients

| <b>Algorithms</b> | <b>TP</b> | <b>FP</b> | <b>TN</b> | <b>FN</b> |
|-------------------|-----------|-----------|-----------|-----------|
| <b>1</b>          | 76        | 10        | 530       | 7         |
| <b>2</b>          | 76        | 12        | 528       | 7         |
| <b>3</b>          | 82        | 15        | 525       | 1         |
| <b>4</b>          | 59        | 11        | 529       | 24        |
| <b>5</b>          | 80        | 12        | 528       | 3         |

**Legend=** CD= Crohn's Disease; FN= false negative; FP= false positive; TN= true negative; TP= true positive.

**Supplement, Table 4** Number of true positive, false positive, true negative and false negative cases for each algorithm developed for identification of 51 UC patients

| <b>Algorithms</b> | <b>TP</b> | <b>FP</b> | <b>TN</b> | <b>FN</b> |
|-------------------|-----------|-----------|-----------|-----------|
| <b>1</b>          | 46        | 45        | 527       | 5         |
| <b>2</b>          | 47        | 47        | 525       | 4         |
| <b>3</b>          | 48        | 48        | 524       | 3         |
| <b>4</b>          | 33        | 35        | 537       | 18        |
| <b>5</b>          | 38        | 21        | 551       | 13        |

**Legend=** FN= false negative; FP= false positive; TN= true negative; TP= true positive; UC=ulcerative colitis.
